# Supplementary material for: Intraspecific variation of a dominant grass and local adaptation in reciprocal garden communities along a US Great Plains’ precipitation gradient: implications for grassland restoration with climate change
Source: PubMed Central journal article supplement (PMC4516422; doi:10.1111/eva.12281), 2015-07-16
Supplement: eva0008-0705-sd1.pdf [file eva0008-0705-sd1.pdf]

Supplemental table 1. Statistical analyses of establishment, cover, and SPAD chlorophyll absorbance. Factors include planting site (S), Ecotype (E), for cover and SPAD also includes Growing Degree Day (GDD, both linear and quadratic) and all possible interactions.

| FACTOR   | ESTABLISHMENT                        |                   | COVER                                |               | SPAD                                 |                   |
|----------|--------------------------------------|-------------------|--------------------------------------|---------------|--------------------------------------|-------------------|
|          | F, Df <sub>n</sub> , Df <sub>d</sub> | P>F               | F, Df <sub>n</sub> , Df <sub>d</sub> | P>F           | F, Df <sub>n</sub> , Df <sub>d</sub> | P>F               |
| S        | 25.46, 3, 10.42                      | <b>&lt;0.0001</b> | 7.93, 3, 30.92                       | <b>0.0005</b> | 6.99, 3, 12                          | <b>0.0056</b>     |
| E        | 8.73, 2, 21.94                       | <b>0.0016</b>     | 0.76, 2, 59.45                       | 0.4716        | 0.46, 2, 24                          | 0.6395            |
| E*S      | 0.46, 6, 19.59                       | 0.8322            | 4.33, 6, 58.56                       | <b>0.0011</b> | 0.56, 6, 24                          | 0.7609            |
| GDD      |                                      |                   | 0.05, 1, 36                          | 0.8287        | 37.66, 1, 18                         | <b>&lt;0.0001</b> |
| GDD*S    |                                      |                   | 5.39, 3, 36                          | <b>0.0036</b> | 11.59, 3, 118                        | <b>&lt;0.0001</b> |
| GDD*E    |                                      |                   | 4.68, 2, 36.01                       | <b>0.0156</b> | 0.50, 2, 118                         | 0.6096            |
| GDD*S*E  |                                      |                   | 1.17, 6, 36.01                       | 0.3424        | 0.66, 6, 118                         | 0.6846            |
| GDD2     |                                      |                   |                                      |               | 60.08, 1, 118                        | <b>&lt;0.0001</b> |
| GDD2*S   |                                      |                   |                                      |               | 11.42, 3, 118                        | <b>&lt;0.0001</b> |
| GDD2*E   |                                      |                   |                                      |               | 0.62, 2, 118                         | 0.5389            |
| GDD2*S*E |                                      |                   |                                      |               | 0.76, 6, 118                         | 0.6016            |

Supplemental-Table 2. Statistical analyses of photosynthesis, conductance, internal CO<sub>2</sub>, transpiration, and WUE. Factors include planting site (S), Ecotype (E), Growing Degree Day (GDD, both linear and quadratic) and all possible interactions.

| FACTOR   | PHOTOSYNTHESIS                       |                   | CONDUCTANCE                          |                   | INTERNAL CO <sub>2</sub>             |                   | TRANSPIRATION                        |                   | WUE                                  |                   |
|----------|--------------------------------------|-------------------|--------------------------------------|-------------------|--------------------------------------|-------------------|--------------------------------------|-------------------|--------------------------------------|-------------------|
|          | F, Df <sub>n</sub> , Df <sub>d</sub> | P                 | F, Df <sub>n</sub> , Df <sub>d</sub> | P                 | F, Df <sub>n</sub> , Df <sub>d</sub> | P                 | F, Df <sub>n</sub> , Df <sub>d</sub> | P                 | F, Df <sub>n</sub> , Df <sub>d</sub> | P                 |
| S        | 5.68, 3, 12                          | <b>0.011</b>      | 18.91, 3, 75.99                      | <b>&lt;0.0001</b> | 7.54, 3, 42.45                       | <b>0.0004</b>     | 10.55, 3, 104.2                      | <b>&lt;0.0001</b> | 26.37, 3, 42.01                      | <b>&lt;0.0001</b> |
| E        | 0.36, 2, 24                          | 0.698             | 0.91, 2, 75.14                       | 0.40              | 1.08, 2, 60.49                       | 0.3467            | 2.32, 2, 100.3                       | 0.1039            | 1.70, 2, 56.48                       | 0.19              |
| E*S      | 1.47, 6, 24                          | 0.229             | 1.72, 6, 75.46                       | 0.1290            | 0.27, 6, 49.1                        | 0.9487            | 0.58, 6, 99.64                       | 0.74              | 0.38, 6, 47.37                       | 0.88              |
| GDD      | 19.42, 1, 72                         | <b>&lt;0.0001</b> | 118.6, 1, 72.84                      | <b>&lt;0.0001</b> | 33.60, 1, 57.64                      | <b>&lt;0.0001</b> | 19.97, 1, 96.41                      | <b>&lt;0.0001</b> | 71.11, 1, 60.55                      | <b>&lt;0.0001</b> |
| GDD*S    | 4.06, 3, 72                          | <b>0.010</b>      | 10.27, 3, 72.62                      | <b>&lt;0.0001</b> | 6.57, 3, 43.16                       | <b>0.0009</b>     | 9.65, 3, 96.25                       | <b>&lt;0.0001</b> | 19.67, 3, 42.51                      | <b>&lt;0.0001</b> |
| GDD*E    | 0.63, 2, 72                          | 0.533             | 0.64, 2, 73.13                       | 0.53              | 0.96, 2, 57.64                       | 0.3874            | 1.51, 2, 98.89                       | 0.22              | 1.53, 2, 59.7                        | 0.22              |
| GDD*S*E  | 1.19, 6, 72                          | 0.319             | 1.28, 6, 72.83                       | 0.27              | 0.29, 6, 49.88                       | 0.9396            | 0.49, 6, 98.07                       | 0.81              | 0.47, 6, 48.94                       | 0.82              |
| GDD2     | 10.51, 1, 72                         | <b>0.0018</b>     | 98.33, 1, 72.79                      | <b>&lt;0.0001</b> | 35.76, 1, 49.48                      | <b>&lt;0.0001</b> | 14.55, 1, 96.37                      | <b>0.0002</b>     | 67.43, 1, 55.21                      | <b>&lt;0.0001</b> |
| GDD2*S   | 4.44, 3, 72                          | <b>0.0064</b>     | 5.99, 3, 72.65                       | <b>0.0011</b>     | 3.51, 3, 44.02                       | <b>0.0229</b>     | 5.51, 3, 96.27                       | <b>0.0016</b>     | 9.49, 3, 43.88                       | <b>&lt;0.0001</b> |
| GDD2*E   | 0.73, 2, 72                          | 0.48              | 0.59, 2, 73.06                       | 0.5577            | 0.82, 2, 49.48                       | 0.4447            | 1.17, 2, 98.69                       | 0.31              | 1.31, 2, 54.75                       | 0.27              |
| GDD2*S*E | 0.98, 6, 72                          | 0.44              | 1.00, 6, 72.87                       | 0.4294            | 0.26, 6, 50.86                       | 0.9525            | 0.53, 6, 98.17                       | 0.78              | 0.43, 6, 50.5                        | 0.85              |
